# Supplementary material for: Methyl Jasmonate Protects the PS II System by Maintaining the Stability of Chloroplast D1 Protein and Accelerating Enzymatic Antioxidants in Heat-Stressed Wheat Plants
Source: MDPI journal article supplement (doi:10.3390/antiox10081216), 2021-07-28
Supplement: s1 [file s1]

Article

# Methyl Jasmonate Protects the PS II System by Maintaining the Stability of Chloroplast D1 Protein and Accelerating Enzymatic Antioxidants in Heat-Stressed Wheat Plants

Mehar Fatma <sup>1</sup>, Noushina Iqbal <sup>2</sup>, Zebus Sehar <sup>1</sup>, Mohammed Nasser Alyemeni <sup>3</sup>, Prashant Kaushik <sup>4</sup>, Nafees A. Khan <sup>1,\*</sup> and Parvaiz Ahmad <sup>3,\*</sup>

<sup>1</sup> Plant Physiology and Biochemistry Laboratory, Department of Botany, Aligarh Muslim University, Aligarh 202002, India; meharfatma30@gmail.com (M.F.); seharzebus5779@gmail.com (Z.S.)

<sup>2</sup> Department of Botany, School of Chemical and Life Sciences, Jamia Hamdard, New Delhi 110062, India; naushina.iqbal@gmail.com

<sup>3</sup> Botany and Microbiology Department, College of Science, King Saud University, Riyadh 11451, Saudi Arabia; mnalyemeni@gmail.com

<sup>4</sup> Kikugawa Research Station, Yokohama Ueki, 2265, Kamo, Kikugawa City, Shizuoka 439-0031, Japan; kaushik.prashant@yokohamaueki.co.jp

\* Correspondence: na.khan.bt@amu.ac.in or naf9.amu@gmail.com (N.A.K.); Pahmad@ksu.edu.sa or parvaizbot@yahoo.com (P.A.)

Supplementary Figure S1

Supporting Information File for Western blotting

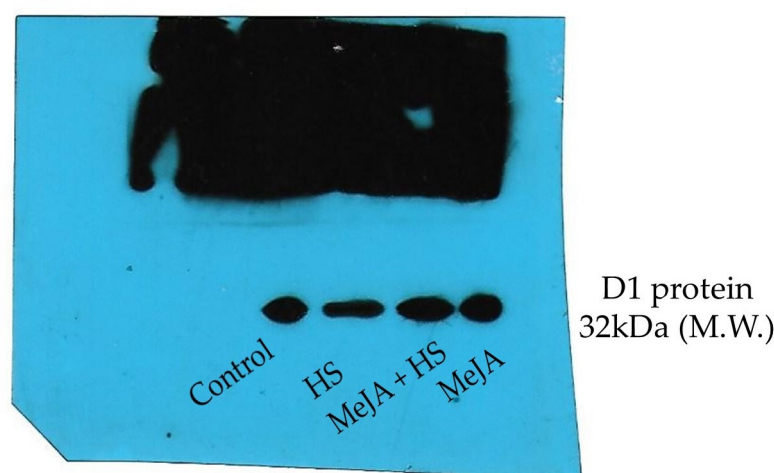

**Figure S1.** Immunoblot analyses of thylakoid protein (D1) obtained from wheat leaves at 30 days after sowing. Plants were treated with MeJA (10  $\mu$ M) in presence (42  $^{\circ}$ C) or absence (25  $^{\circ}$ C) of heat stress. Immunoblotting were done using specific antibodies raised against the D1 protein. HS, heat stress; MeJA, methyl jasmonate.
